# Supplementary material for: Function of fibroblast growth factor 2 in gastric cancer occurrence and prognosis
Source: PubMed Central journal article supplement — Mol Med Rep. 2019 Nov 26;21(2):575–82. doi: 10.3892/mmr.2019.10850 (PMC6947937; doi:10.3892/mmr.2019.10850), 2019-11-26
Supplement: Supplementary_Data.pdf [file Supplementary_Data.pdf]

Table SI. Differentially expressed genes between the FGF2-high and FGF2-low expressing cohorts.

| ID_Reference | Gene symbol | logFC    | AveExpr  | P-value                |
|--------------|-------------|----------|----------|------------------------|
| 217757_at    | A2M         | 1.065089 | 11.04294 | 5.16x10 <sup>-57</sup> |
| 204719_at    | ABCA8       | 2.36068  | 6.52549  | 1.54x10 <sup>-47</sup> |
| 223395_at    | ABI3BP      | 2.048039 | 7.493172 | 1.31x10 <sup>-50</sup> |
| 208335_s_at  | ACKR1       | 1.679735 | 6.923448 | 1.12x10 <sup>-54</sup> |
| 200974_at    | ACTA2       | 1.274664 | 11.74393 | 1.22x10 <sup>-54</sup> |
| 205132_at    | ACTC1       | 1.00554  | 7.188612 | 8.02x10 <sup>-35</sup> |
| 202274_at    | ACTG2       | 2.163791 | 9.642526 | 1.26x10 <sup>-46</sup> |
| 222162_s_at  | ADAMTS1     | 1.339759 | 8.756471 | 4.17x10 <sup>-54</sup> |
| 235649_at    | ADAMTS8     | 1.03895  | 6.073968 | 9.91x10 <sup>-36</sup> |
| 213974_at    | ADAMTSL3    | 1.312725 | 5.119723 | 4.21x10 <sup>-44</sup> |
| 209613_s_at  | ADH1B       | 2.547282 | 5.962383 | 9.86x10 <sup>-39</sup> |
| 201792_at    | AEBP1       | 1.023052 | 8.739943 | 8.26x10 <sup>-36</sup> |
| 227198_at    | AFF3        | 1.037685 | 4.335622 | 1.04x10 <sup>-26</sup> |
| 205357_s_at  | AGTR1       | 1.287694 | 4.354583 | 8.06x10 <sup>-25</sup> |
| 212992_at    | AHNAK2      | 1.059194 | 7.478618 | 4.74x10 <sup>-16</sup> |
| 232113_at    | AK021804    | 1.745959 | 5.663355 | 2.44x10 <sup>-50</sup> |
| 227529_s_at  | AKAP12      | 1.635734 | 4.869646 | 2.27x10 <sup>-46</sup> |
| 212607_at    | AKT3        | 1.218297 | 7.673788 | 3.68x10 <sup>-64</sup> |
| 203180_at    | ALDH1A3     | 1.216688 | 8.201018 | 6.56x10 <sup>-41</sup> |
| 225450_at    | AMOTL1      | 1.105457 | 7.903183 | 2.23x10 <sup>-49</sup> |
| 231773_at    | ANGPTL1     | 1.781891 | 4.688593 | 1.09x10 <sup>-48</sup> |
| 213001_at    | ANGPTL2     | 1.286343 | 8.162382 | 4.75x10 <sup>-56</sup> |
| 202920_at    | ANK2        | 2.074811 | 5.847461 | 2.57x10 <sup>-59</sup> |
| 224694_at    | ANTXR1      | 1.178185 | 9.537604 | 3.27x10 <sup>-43</sup> |
| 225524_at    | ANTXR2      | 1.030992 | 8.96491  | 1.18x10 <sup>-37</sup> |
| 204894_s_at  | AOC3        | 1.777165 | 7.303018 | 1.16x10 <sup>-62</sup> |
| 205083_at    | AOX1        | 1.283515 | 5.033872 | 6.94x10 <sup>-41</sup> |
| 230264_s_at  | AP1S2       | 1.125163 | 8.612486 | 2.29x10 <sup>-52</sup> |
| 201525_at    | APOD        | 1.585315 | 7.30676  | 2.1x10 <sup>-30</sup>  |
| 227197_at    | ARHGEF26    | 1.164366 | 6.261772 | 8x10 <sup>-22</sup>    |
| 218694_at    | ARMCX1      | 1.236526 | 7.340966 | 8.88x10 <sup>-43</sup> |
| 203404_at    | ARMCX2      | 1.224177 | 7.571608 | 5.9x10 <sup>-41</sup>  |
| 227915_at    | ASB2        | 1.074521 | 6.397813 | 5.73x10 <sup>-35</sup> |
| 235503_at    | ASB5        | 1.253447 | 3.349779 | 1.02x10 <sup>-26</sup> |
| 224396_s_at  | ASPN        | 1.819624 | 7.045254 | 7.14x10 <sup>-40</sup> |
| 203296_s_at  | ATP1A2      | 1.465355 | 4.263065 | 8.49x10 <sup>-38</sup> |
| 226771_at    | ATP8B2      | 1.234411 | 7.556173 | 3.8x10 <sup>-58</sup>  |
| 219845_at    | BARX1       | 1.023254 | 5.477229 | 1.9x10 <sup>-39</sup>  |
| 205433_at    | BCHE        | 1.49697  | 4.346225 | 5.83x10 <sup>-32</sup> |
| 203685_at    | BCL2        | 1.013982 | 6.298786 | 2.06x10 <sup>-43</sup> |
| 215440_s_at  | BEX4        | 1.407829 | 6.986196 | 9.51x10 <sup>-45</sup> |
| 228636_at    | BHLHE22     | 1.168794 | 5.876973 | 5.88x10 <sup>-55</sup> |
| 219902_at    | BHMT2       | 1.161224 | 5.234941 | 2.58x10 <sup>-55</sup> |
| 213429_at    | BICC1       | 1.458643 | 6.644672 | 1.79x10 <sup>-57</sup> |
| 229975_at    | BMPR1B      | 1.174886 | 4.864457 | 1.36x10 <sup>-23</sup> |
| 238478_at    | BNC2        | 1.458264 | 5.748356 | 3.99x10 <sup>-56</sup> |
| 225990_at    | BOC         | 1.57954  | 6.857617 | 1.08x10 <sup>-60</sup> |
| 227099_s_at  | C11orf96    | 1.28267  | 10.32117 | 7.69x10 <sup>-67</sup> |
| 218820_at    | C14orf132   | 1.446835 | 6.702379 | 1.37x10 <sup>-55</sup> |
| 239349_at    | C1QTNF7     | 1.464119 | 4.83869  | 1.48x10 <sup>-42</sup> |
| 212067_s_at  | C1R         | 1.213088 | 9.579432 | 2.37x10 <sup>-54</sup> |
| 1555229_a_at | C1S         | 1.447111 | 6.857561 | 7.7x10 <sup>-39</sup>  |
| 223623_at    | C2orf40     | 2.689582 | 6.585739 | 4.19x10 <sup>-50</sup> |
| 242447_at    | C3orf70     | 1.448976 | 7.229117 | 4.76x10 <sup>-34</sup> |
| 202992_at    | C7          | 2.492734 | 7.075298 | 1.26x10 <sup>-48</sup> |
| 1557961_s_at | C8orf88     | 1.496565 | 4.455728 | 1.28x10 <sup>-53</sup> |
| 227623_at    | CACNA2D1    | 1.349509 | 7.00894  | 2.37x10 <sup>-36</sup> |
| 213714_at    | CACNB2      | 1.523138 | 4.876809 | 3.64x10 <sup>-53</sup> |
| 201617_x_at  | CALD1       | 1.499472 | 8.472231 | 1.67x10 <sup>-52</sup> |

Table SI. Continued.

| ID_Reference | Gene symbol | logFC    | AveExpr  | P-value                |
|--------------|-------------|----------|----------|------------------------|
| 212554_at    | CAP2        | 1.162675 | 6.652594 | 4.42x10 <sup>-29</sup> |
| 202965_s_at  | CAPN6       | 1.033082 | 6.826273 | 2.56x10 <sup>-13</sup> |
| 207317_s_at  | CASQ2       | 1.24783  | 5.417277 | 6.24x10 <sup>-35</sup> |
| 203065_s_at  | CAV1        | 1.378847 | 9.416034 | 1.5x10 <sup>-52</sup>  |
| 1553102_a_at | CCDC69      | 1.288479 | 6.315944 | 6.19x10 <sup>-45</sup> |
| 225242_s_at  | CCDC80      | 2.132505 | 7.705529 | 2.02x10 <sup>-57</sup> |
| 210133_at    | CCL11       | 1.412982 | 8.398659 | 4.41x10 <sup>-29</sup> |
| 210072_at    | CCL19       | 1.460887 | 7.195902 | 6.57x10 <sup>-28</sup> |
| 216598_s_at  | CCL2        | 1.440282 | 8.654143 | 1.6x10 <sup>-48</sup>  |
| 205476_at    | CCL20       | -1.0668  | 9.580674 | 7.83x10 <sup>-12</sup> |
| 226545_at    | CD109       | 1.1827   | 7.133929 | 3.82x10 <sup>-35</sup> |
| 209583_s_at  | CD200       | 1.03153  | 7.337158 | 2.27x10 <sup>-46</sup> |
| 228766_at    | CD36        | 1.348235 | 5.548096 | 6.32x10 <sup>-32</sup> |
| 225685_at    | CDC42EP3    | 1.186353 | 7.540884 | 1.48x10 <sup>-40</sup> |
| 236179_at    | CDH11       | 1.32693  | 6.535344 | 2.4x10 <sup>-43</sup>  |
| 206898_at    | CDH19       | 1.219522 | 4.267693 | 9.2x10 <sup>-26</sup>  |
| 204154_at    | CDO1        | 1.477004 | 4.300019 | 8.26x10 <sup>-54</sup> |
| 206199_at    | CEACAM7     | -1.01116 | 7.088793 | 4.72x10 <sup>-08</sup> |
| 202158_s_at  | CELF2       | 1.133865 | 6.754194 | 3.47x10 <sup>-45</sup> |
| 205382_s_at  | CFD         | 1.057099 | 8.264402 | 4.39x10 <sup>-23</sup> |
| 213800_at    | CFH         | 1.316758 | 7.977    | 6.24x10 <sup>-36</sup> |
| 233496_s_at  | CFL2        | 1.509101 | 5.873359 | 1.49x10 <sup>-44</sup> |
| 206932_at    | CH25H       | 1.461209 | 6.417308 | 5.69x10 <sup>-57</sup> |
| 209763_at    | CHRDL1      | 2.191635 | 6.148062 | 1.15x10 <sup>-53</sup> |
| 223987_at    | CHRDL2      | 1.732597 | 6.129378 | 1.08x10 <sup>-55</sup> |
| 210221_at    | CHRNA3      | 1.068412 | 5.41386  | 1.21x10 <sup>-22</sup> |
| 206227_at    | CILP        | 1.335129 | 6.697088 | 1.23x10 <sup>-34</sup> |
| 228335_at    | CLDN11      | 1.234975 | 5.147174 | 7.38x10 <sup>-25</sup> |
| 213415_at    | CLIC2       | 1.066756 | 6.619424 | 8.48x10 <sup>-42</sup> |
| 226425_at    | CLIP4       | 1.181352 | 7.465157 | 8.29x10 <sup>-40</sup> |
| 226834_at    | CLMP        | 1.932748 | 7.071306 | 4.29x10 <sup>-63</sup> |
| 222043_at    | CLU         | 1.459341 | 5.846454 | 1.14x10 <sup>-32</sup> |
| 205518_s_at  | CMAHP       | 1.207736 | 5.818729 | 1.51x10 <sup>-43</sup> |
| 203951_at    | CNN1        | 2.171485 | 7.909074 | 2.54x10 <sup>-51</sup> |
| 213436_at    | CNR1        | 1.102292 | 3.981284 | 5.37x10 <sup>-26</sup> |
| 226751_at    | CNRIP1      | 1.255369 | 7.86723  | 5.26x10 <sup>-70</sup> |
| 227209_at    | CNTN1       | 1.000511 | 4.396731 | 1.86x10 <sup>-27</sup> |
| 229084_at    | CNTN4       | 1.221219 | 6.008486 | 1.37x10 <sup>-44</sup> |
| 217428_s_at  | COL10A1     | 1.067548 | 6.784179 | 2.04x10 <sup>-09</sup> |
| 212865_s_at  | COL14A1     | 2.152039 | 6.991916 | 1.41x10 <sup>-64</sup> |
| 203477_at    | COL15A1     | 1.112896 | 9.686863 | 3.16x10 <sup>-42</sup> |
| 229218_at    | COL1A2      | 1.112214 | 7.408711 | 6.28x10 <sup>-24</sup> |
| 208096_s_at  | COL21A1     | 1.137022 | 5.84601  | 3.9x10 <sup>-28</sup>  |
| 232458_at    | COL3A1      | 1.182304 | 6.560806 | 1.51x10 <sup>-27</sup> |
| 229779_at    | COL4A4      | 1.155796 | 5.103599 | 8.76x10 <sup>-30</sup> |
| 213110_s_at  | COL4A5      | 1.061205 | 6.859829 | 1.48x10 <sup>-18</sup> |
| 209156_s_at  | COL6A2      | 1.07669  | 7.88987  | 1.52x10 <sup>-40</sup> |
| 226237_at    | COL8A1      | 1.822085 | 8.401867 | 6.26x10 <sup>-45</sup> |
| 221900_at    | COL8A2      | 1.057165 | 5.979842 | 6.2x10 <sup>-35</sup>  |
| 221019_s_at  | COLEC12     | 1.505377 | 6.326895 | 1.89x10 <sup>-46</sup> |
| 204570_at    | COX7A1      | 1.257298 | 7.801783 | 7.93x10 <sup>-64</sup> |
| 205624_at    | CPA3        | 1.535037 | 8.502464 | 5.42x10 <sup>-31</sup> |
| 201117_s_at  | CPE         | 1.632016 | 7.662866 | 2.31x10 <sup>-44</sup> |
| 228728_at    | CPED1       | 1.675329 | 8.328383 | 3.27x10 <sup>-57</sup> |
| 226824_at    | CPXM2       | 1.462753 | 7.133381 | 1.54x10 <sup>-53</sup> |
| 223475_at    | CRISPLD1    | 1.660626 | 6.096335 | 1.4x10 <sup>-41</sup>  |
| 221541_at    | CRISPLD2    | 1.112133 | 8.994079 | 5.95x10 <sup>-52</sup> |
| 209283_at    | CRYAB       | 1.620838 | 7.358321 | 3.77x10 <sup>-59</sup> |
| 219049_at    | CSGALNACT1  | 1.011119 | 8.168621 | 3.44x10 <sup>-34</sup> |

Table SI. Continued.

| ID_Reference           | Gene symbol | logFC    | AveExpr         | P-value                |
|------------------------|-------------|----------|-----------------|------------------------|
| 207030_s_at            | CSRP2       | 1.072647 | 8.79283         | 4.41x10 <sup>-42</sup> |
| 209101_at              | CTGF        | 1.049546 | 10.46536        | 1.2x10 <sup>-44</sup>  |
| 225681_at              | CTHRC1      | 1.007818 | 9.910791        | 2.73x10 <sup>-21</sup> |
| 202450_s_at            | CTSK        | 1.176558 | 9.693792        | 8.18x10 <sup>-45</sup> |
| 209687_at              | CXCL12      | 2.067561 | 7.381383        | 1.39x10 <sup>-50</sup> |
| 222453_at              | CYBRD1      | 1.392611 | 9.38209         | 1.2x10 <sup>-47</sup>  |
| 202437_s_at            | CYP1B1      | 2.190448 | 6.863208        | 1.07x10 <sup>-49</sup> |
| 226402_at              | CYP2U1      | 1.090298 | 5.903092        | 3.13x10 <sup>-50</sup> |
| 220432_s_at            | CYP39A1     | 1.015146 | 4.675046        | 3.3x10 <sup>-24</sup>  |
| 210764_s_at            | CYR61       | 1.101954 | 9.058019        | 1.14x10 <sup>-34</sup> |
| 228665_at              | CYYR1       | 1.054223 | 7.247237        | 4.8x10 <sup>-50</sup>  |
| 219179_at              | DACT1       | 1.292967 | 7.208883        | 3.57x10 <sup>-44</sup> |
| 228228_at              | DACT3       | 1.193561 | 7.552051        | 4.83x10 <sup>-46</sup> |
| 229800_at              | DCLK1       | 1.815023 | 5.379538        | 5.68x10 <sup>-57</sup> |
| 209335_at              | DCN         | 1.649479 | 9.57375         | 1.04x10 <sup>-62</sup> |
| 225442_at              | DDR2        | 1.740789 | 7.997579        | 4.54x10 <sup>-73</sup> |
| 202222_s_at            | DES         | 2.052752 | 7.459689        | 4.6x10 <sup>-40</sup>  |
| 231240_at              | DIO2        | 1.119888 | 6.24695         | 1.63x10 <sup>-30</sup> |
| 214724_at              | DIXDC1      | 1.450489 | 7.497302        | 1.46x10 <sup>-55</sup> |
| 210762_s_at            | DLC1        | 1.148761 | 8.226454        | 6.66x10 <sup>-57</sup> |
| 203881_s_at            | DMD         | 1.326249 | 7.029113        | 2.65x10 <sup>-34</sup> |
| 232090_at              | DNM3OS      | 1.401455 | 4.938497        | 3.96x10 <sup>-56</sup> |
| 214844_s_at            | DOK5        | 1.022649 | 6.116959        | 7.19x10 <sup>-41</sup> |
| 213068_at              | DPT         | 1.543886 | 5.684595        | 1.42x10 <sup>-31</sup> |
| 201431_s_at            | DPYSL3      | 1.662082 | 8.097429        | 3.3x10 <sup>-61</sup>  |
| 232235_at              | DSEL        | 1.178031 | 4.289136        | 2x10 <sup>-44</sup>    |
| 227084_at              | DTNA        | 1.337107 | 5.468201        | 2.01x10 <sup>-36</sup> |
| 204557_s_at            | DZIP1       | 1.234636 | 4.361916        | 6.36x10 <sup>-48</sup> |
| 227646_at              | EBF1        | 1.320178 | 6.999989        | 2.19x10 <sup>-50</sup> |
| 206101_at              | ECM2        | 1.346246 | 7.546573        | 1.21x10 <sup>-49</sup> |
| 204464_s_at            | EDNRA       | 1.256801 | 8.208259        | 9.17x10 <sup>-48</sup> |
| 201843_s_at            | EFEMP1      | 2.010832 | 6.995407        | 2.66x10 <sup>-58</sup> |
| 209356_x_at            | EFEMP2      | 1.024165 | 7.861738        | 1.13x10 <sup>-50</sup> |
| 204400_at              | EFS         | 1.131154 | 5.503141        | 7.55x10 <sup>-46</sup> |
| 227874_at              | EMCN        | 1.20545  | 6.396462        | 3.68x10 <sup>-51</sup> |
| 204163_at              | EMILIN1     | 1.079892 | 7.125621        | 8.71x10 <sup>-51</sup> |
| 204796_at              | EML1        | 1.653594 | 5.765432        | 6.79x10 <sup>-61</sup> |
| 206070_s_at            | EPHA3       | 1.785194 | 5.95856         | 3.35x10 <sup>-51</sup> |
| 227449_at              | EPHA4       | 1.003416 | 4.831785        | 7.49x10 <sup>-31</sup> |
| 229288_at              | EPHA7       | 1.607989 | 5.308623        | 4.13x10 <sup>-39</sup> |
| 213541_s_at            | ERG         | 1.116865 | 5.967804        | 1.45x10 <sup>-61</sup> |
| 203305_at              | F13A1       | 1.387489 | 7.034171        | 4.39x10 <sup>-37</sup> |
| 203980_at              | FABP4       | 1.893713 | 6.41365         | 5x10 <sup>-44</sup>    |
| 217967_s_at            | FAM129A     | 1.511086 | 8.892622        | 1.25x10 <sup>-48</sup> |
| 1554547_at             | FAM13C      | 1.440462 | 6.10271         | 7.16x10 <sup>-54</sup> |
| 209955_s_at            | FAP         | 1.236905 | 7.451806        | 2.21x10 <sup>-31</sup> |
| 219427_at              | FAT4        | 1.117614 | 6.385068        | 4.42x10 <sup>-48</sup> |
| 202995_s_at            | FBLN1       | 1.964594 | 7.782264        | 9.22x10 <sup>-51</sup> |
| 203088_at              | FBLN5       | 1.30069  | 6.885305        | 2.34x10 <sup>-55</sup> |
| 235318_at              | FBN1        | 1.393704 | 5.628574        | 8.48x10 <sup>-54</sup> |
| 213249_at              | FBXL7       | 1.00266  | 6.176462        | 8.63x10 <sup>-58</sup> |
| 225328_at              | FBXO32      | 1.507225 | 7.906075        | 4.29x10 <sup>-47</sup> |
| 211734_s_at            | FCER1A      | 1.105685 | 4.680051        | 1.13x10 <sup>-26</sup> |
| 209210_s_at            | FERMT2      | 1.581391 | 9.33277         | 1.55x10 <sup>-66</sup> |
| 203562_at              | FEZ1        | 1.20955  | 7.206101        | 1.09x10 <sup>-44</sup> |
| 205110_s_at            | FGF13       | 1.195803 | 5.814093        | 1.68x10 <sup>-27</sup> |
| 204422_s_at            | FGF2        | 1.812552 | 4 . 4 3 8 0 4 7 |                        |
| 9.3x10 <sup>-106</sup> |             |          |                 |                        |
| 205782_at              | FGF7        | 2.017263 | 5.764741        | 4.64x10 <sup>-80</sup> |

Table SI. Continued.

| ID_Reference | Gene symbol | logFC    | AveExpr  | P-value                |
|--------------|-------------|----------|----------|------------------------|
| 210299_s_at  | FHL1        | 2.310315 | 7.447099 | 8.49x10 <sup>-61</sup> |
| 226769_at    | FIBIN       | 1.370193 | 7.339854 | 2.29x10 <sup>-51</sup> |
| 235183_at    | FILIP1      | 1.854132 | 5.540998 | 4.7x10 <sup>-62</sup>  |
| 1554966_a_at | FILIP1L     | 1.20226  | 8.480035 | 1.28x10 <sup>-54</sup> |
| 213746_s_at  | FLNA        | 1.129572 | 7.762515 | 3.29x10 <sup>-39</sup> |
| 207876_s_at  | FLNC        | 1.064071 | 7.210243 | 2.95x10 <sup>-36</sup> |
| 205666_at    | FMO1        | 1.039396 | 6.010224 | 6.12x10 <sup>-27</sup> |
| 228268_at    | FMO2        | 1.160355 | 6.34779  | 1.09x10 <sup>-33</sup> |
| 212288_at    | FNBP1       | 1.163783 | 8.634981 | 6.63x10 <sup>-46</sup> |
| 226930_at    | FNDC1       | 1.676244 | 6.253294 | 1.5x10 <sup>-32</sup>  |
| 205935_at    | FOXF1       | 1.335097 | 8.454597 | 8.17x10 <sup>-59</sup> |
| 206377_at    | FOXF2       | 1.057438 | 7.48749  | 2.18x10 <sup>-29</sup> |
| 243278_at    | FOXP2       | 1.896226 | 4.938535 | 3.43x10 <sup>-50</sup> |
| 225481_at    | FRMD6       | 1.407424 | 8.229939 | 1.85x10 <sup>-55</sup> |
| 204072_s_at  | FRY         | 1.123822 | 7.513086 | 3x10 <sup>-41</sup>    |
| 203697_at    | FRZB        | 1.598085 | 7.562581 | 3.74x10 <sup>-46</sup> |
| 208782_at    | FSTL1       | 1.092038 | 10.63994 | 1.93x10 <sup>-58</sup> |
| 217897_at    | FXYD6       | 1.211031 | 7.227347 | 1.64x10 <sup>-53</sup> |
| 204457_s_at  | GAS1        | 1.895929 | 7.395589 | 9.32x10 <sup>-43</sup> |
| 204472_at    | GEM         | 1.250744 | 9.239113 | 1.75x10 <sup>-55</sup> |
| 205100_at    | GFPT2       | 1.090556 | 5.906321 | 1.72x10 <sup>-44</sup> |
| 228376_at    | GGTA1P      | 1.072437 | 6.800634 | 1.1x10 <sup>-33</sup>  |
| 205498_at    | GHR         | 1.527997 | 4.711158 | 2.83x10 <sup>-50</sup> |
| 235306_at    | GIMAP8      | 1.009113 | 6.685512 | 9.17x10 <sup>-39</sup> |
| 228776_at    | GJC1        | 1.184274 | 6.78981  | 3.02x10 <sup>-39</sup> |
| 227376_at    | GLI3        | 1.107486 | 6.047998 | 7.94x10 <sup>-51</sup> |
| 226142_at    | GLIPR1      | 1.126382 | 7.046018 | 2.59x10 <sup>-48</sup> |
| 205280_at    | GLRB        | 1.038404 | 3.849027 | 1.12x10 <sup>-40</sup> |
| 227070_at    | GLT8D2      | 1.559217 | 7.278455 | 3.48x10 <sup>-58</sup> |
| 213924_at    | GNAL        | 1.00413  | 5.953895 | 5.73x10 <sup>-42</sup> |
| 225710_at    | GNB4        | 1.082476 | 9.245396 | 4.72x10 <sup>-48</sup> |
| 204115_at    | GNG11       | 1.085231 | 8.830585 | 2.12x10 <sup>-64</sup> |
| 227059_at    | GPC6        | 1.151735 | 7.797625 | 6.69x10 <sup>-40</sup> |
| 209170_s_at  | GPM6B       | 1.501044 | 6.012443 | 2.7x10 <sup>-37</sup>  |
| 232267_at    | GPR133      | 1.181779 | 5.299388 | 1.52x10 <sup>-32</sup> |
| 231166_at    | GPR155      | 1.191129 | 5.816635 | 5.39x10 <sup>-26</sup> |
| 223620_at    | GPR34       | 1.014047 | 6.999188 | 1.72x10 <sup>-26</sup> |
| 204793_at    | GPRASP1     | 1.48924  | 5.662288 | 5.09x10 <sup>-53</sup> |
| 228141_at    | GPX8        | 1.118092 | 6.412399 | 1.5x10 <sup>-38</sup>  |
| 218468_s_at  | GREM1       | 2.334019 | 9.593865 | 1.7x10 <sup>-55</sup>  |
| 220794_at    | GREM2       | 1.296546 | 4.647237 | 2.27x10 <sup>-31</sup> |
| 229530_at    | GUCY1A3     | 1.736233 | 7.955559 | 6.57x10 <sup>-66</sup> |
| 203817_at    | GUCY1B3     | 1.408051 | 8.426509 | 3x10 <sup>-67</sup>    |
| 235371_at    | GXYLT2      | 1.045445 | 6.059527 | 4.61x10 <sup>-26</sup> |
| 236141_at    | HAND2-AS1   | 1.353338 | 4.082087 | 9.83x10 <sup>-36</sup> |
| 209526_s_at  | HDGFRP3     | 1.194518 | 7.082155 | 1.74x10 <sup>-39</sup> |
| 209960_at    | HGF         | 1.292768 | 5.301763 | 1.81x10 <sup>-51</sup> |
| 235944_at    | HMCN1       | 1.516181 | 5.827121 | 1.33x10 <sup>-52</sup> |
| 211597_s_at  | HOPX        | 1.282371 | 8.784012 | 3.51x10 <sup>-35</sup> |
| 205404_at    | HSD11B1     | 1.193763 | 6.326951 | 1.73x10 <sup>-37</sup> |
| 211538_s_at  | HSPA2       | 1.100348 | 7.020449 | 1.63x10 <sup>-31</sup> |
| 226304_at    | HSPB6       | 1.158759 | 5.016572 | 1.78x10 <sup>-34</sup> |
| 218934_s_at  | HSPB7       | 1.334047 | 5.26956  | 9.74x10 <sup>-39</sup> |
| 221667_s_at  | HSPB8       | 1.813954 | 7.463478 | 2.18x10 <sup>-51</sup> |
| 206638_at    | HTR2B       | 1.240694 | 5.090412 | 6.59x10 <sup>-21</sup> |
| 209292_at    | ID4         | 1.335389 | 5.784481 | 2.73x10 <sup>-37</sup> |
| 227870_at    | IGDCC4      | 1.000822 | 5.924035 | 1.25x10 <sup>-36</sup> |
| 209541_at    | IGF1        | 2.028687 | 6.415371 | 7.76x10 <sup>-52</sup> |
| 201508_at    | IGFBP4      | 1.073051 | 8.334801 | 1.1x10 <sup>-50</sup>  |

Table SI. Continued.

| ID_Reference | Gene symbol | logFC    | AveExpr  | P-value                |
|--------------|-------------|----------|----------|------------------------|
| 211959_at    | IGFBP5      | 1.280783 | 10.28213 | 6.82x10 <sup>-50</sup> |
| 203851_at    | IGFBP6      | 1.03244  | 7.564639 | 4.37x10 <sup>-46</sup> |
| 202948_at    | IL1R1       | 1.06398  | 9.119658 | 6.79x10 <sup>-52</sup> |
| 209821_at    | IL33        | 1.837586 | 6.975217 | 9.65x10 <sup>-46</sup> |
| 205207_at    | IL6         | 1.032642 | 7.212427 | 1.36x10 <sup>-16</sup> |
| 224061_at    | INMT        | 1.126394 | 6.108128 | 4.96x10 <sup>-49</sup> |
| 206104_at    | ISL1        | 1.191263 | 6.961136 | 8.73x10 <sup>-29</sup> |
| 207191_s_at  | ISLR        | 1.066626 | 6.861017 | 8.12x10 <sup>-34</sup> |
| 235182_at    | ISM1        | 1.316171 | 4.663989 | 2.05x10 <sup>-32</sup> |
| 1560359_at   | ITGA1       | 1.175231 | 4.660628 | 2.16x10 <sup>-45</sup> |
| 216331_at    | ITGA7       | 1.0051   | 6.44237  | 1.67x10 <sup>-41</sup> |
| 235666_at    | ITGA8       | 1.114671 | 7.05796  | 4.57x10 <sup>-25</sup> |
| 227297_at    | ITGA9       | 1.35145  | 7.251616 | 4.89x10 <sup>-48</sup> |
| 205422_s_at  | ITGBL1      | 1.614014 | 6.350776 | 6.27x10 <sup>-33</sup> |
| 219064_at    | ITIH5       | 1.127379 | 6.722191 | 1.04x10 <sup>-42</sup> |
| 203710_at    | ITPR1       | 1.041494 | 7.329252 | 1.85x10 <sup>-53</sup> |
| 229127_at    | JAM2        | 1.625865 | 6.001501 | 1.83x10 <sup>-62</sup> |
| 212813_at    | JAM3        | 1.293111 | 7.881046 | 3.64x10 <sup>-59</sup> |
| 218418_s_at  | KANK2       | 1.016497 | 8.789981 | 2.75x10 <sup>-42</sup> |
| 222379_at    | KCNE4       | 1.111398 | 6.12578  | 5.95x10 <sup>-43</sup> |
| 205303_at    | KCNJ8       | 1.217978 | 6.686731 | 2.41x10 <sup>-59</sup> |
| 221584_s_at  | KCNMA1      | 1.749264 | 7.73141  | 1.42x10 <sup>-44</sup> |
| 209948_at    | KCNMB1      | 1.572864 | 6.494257 | 2.62x10 <sup>-48</sup> |
| 212192_at    | KCTD12      | 1.057447 | 10.28755 | 6.81x10 <sup>-41</sup> |
| 231031_at    | KGFLP2      | 1.248753 | 4.73285  | 3.37x10 <sup>-70</sup> |
| 205051_s_at  | KIT         | 1.313106 | 7.420426 | 3.05x10 <sup>-40</sup> |
| 203543_s_at  | KLF9        | 1.180868 | 7.892263 | 4.23x10 <sup>-49</sup> |
| 232297_at    | KLHL5       | 1.057188 | 6.679625 | 5.76x10 <sup>-40</sup> |
| 216840_s_at  | LAMA2       | 1.217313 | 6.477368 | 2.47x10 <sup>-59</sup> |
| 202202_s_at  | LAMA4       | 1.09603  | 8.730881 | 3.6x10 <sup>-54</sup>  |
| 218651_s_at  | LARP6       | 1.085526 | 6.351969 | 6.22x10 <sup>-46</sup> |
| 228080_at    | LAYN        | 1.298688 | 6.499904 | 8.27x10 <sup>-56</sup> |
| 212531_at    | LCN2        | -1.15327 | 11.01416 | 3.39x10 <sup>-11</sup> |
| 213371_at    | LDB3        | 1.32648  | 4.619643 | 1.38x10 <sup>-30</sup> |
| 207996_s_at  | LDLRAD4     | 1.109245 | 6.30153  | 2.9x10 <sup>-44</sup>  |
| 218656_s_at  | LHFP        | 1.399499 | 8.224048 | 9.93x10 <sup>-65</sup> |
| 236304_at    | LINC00702   | 1.081698 | 3.7334   | 8.92x10 <sup>-28</sup> |
| 215039_at    | LINC01140   | 1.177646 | 5.306296 | 5.25x10 <sup>-50</sup> |
| 227061_at    | LINC01279   | 2.39574  | 6.249611 | 7.61x10 <sup>-61</sup> |
| 204424_s_at  | LMO3        | 1.346548 | 5.50412  | 4.8x10 <sup>-41</sup>  |
| 203766_s_at  | LMOD1       | 1.824762 | 7.507462 | 8.03x10 <sup>-52</sup> |
| 225996_at    | LONRF2      | 1.053611 | 4.212152 | 2.31x10 <sup>-20</sup> |
| 204036_at    | LPAR1       | 1.13411  | 7.188525 | 4.73x10 <sup>-41</sup> |
| 213496_at    | LPPR4       | 1.045071 | 5.081925 | 3.93x10 <sup>-38</sup> |
| 227688_at    | LRCH2       | 1.198212 | 4.76743  | 5.28x10 <sup>-63</sup> |
| 205381_at    | LRRC17      | 1.069965 | 5.801924 | 1.12x10 <sup>-26</sup> |
| 1556427_s_at | LRRN4CL     | 1.264104 | 5.953382 | 7.01x10 <sup>-58</sup> |
| 228218_at    | LSAMP       | 1.409676 | 5.864272 | 1.89x10 <sup>-58</sup> |
| 202729_s_at  | LTBP1       | 1.305686 | 9.186455 | 2.78x10 <sup>-57</sup> |
| 229554_at    | LUM         | 1.380195 | 7.668642 | 6.9x10 <sup>-50</sup>  |
| 209737_at    | MAGI2       | 1.039167 | 5.546125 | 8.27x10 <sup>-38</sup> |
| 227554_at    | MAGI2-AS3   | 1.192041 | 5.908926 | 7.78x10 <sup>-68</sup> |
| 228885_at    | MAMDC2      | 1.679841 | 4.734147 | 7.21x10 <sup>-39</sup> |
| 218918_at    | MAN1C1      | 1.106332 | 6.696085 | 6.5x10 <sup>-41</sup>  |
| 212233_at    | MAP1B       | 1.415537 | 7.675917 | 5.97x10 <sup>-54</sup> |
| 225540_at    | MAP2        | 1.112875 | 6.00718  | 4.75x10 <sup>-30</sup> |
| 228423_at    | MAP9        | 1.129564 | 6.67894  | 8.24x10 <sup>-30</sup> |
| 232298_at    | MBNL1-AS1   | 1.711107 | 4.738604 | 1.17x10 <sup>-42</sup> |
| 226225_at    | MCC         | 1.501669 | 6.761465 | 9.43x10 <sup>-67</sup> |

Table SI. Continued.

| ID_Reference | Gene symbol | logFC    | AveExpr  | P-value                |
|--------------|-------------|----------|----------|------------------------|
| 235740_at    | MCTP1       | 1.133399 | 5.794836 | 4.22x10 <sup>-45</sup> |
| 211675_s_at  | MDFIC       | 1.019644 | 8.544866 | 2.17x10 <sup>-47</sup> |
| 227058_at    | MEDAG       | 1.222307 | 6.987198 | 1.38x10 <sup>-46</sup> |
| 209200_at    | MEF2C       | 1.180247 | 7.598292 | 3.38x10 <sup>-59</sup> |
| 204069_at    | MEIS1       | 1.27311  | 7.421461 | 9.61x10 <sup>-44</sup> |
| 205619_s_at  | MEOX1       | 1.156217 | 6.253401 | 5.09x10 <sup>-53</sup> |
| 206201_s_at  | MEOX2       | 1.773969 | 4.139697 | 3.21x10 <sup>-47</sup> |
| 212713_at    | MFAP4       | 1.464882 | 7.093528 | 1.19x10 <sup>-59</sup> |
| 213764_s_at  | MFAP5       | 1.727668 | 6.053169 | 4.54x10 <sup>-37</sup> |
| 232568_at    | MGC24103    | 1.018643 | 4.342466 | 1.24x10 <sup>-36</sup> |
| 202291_s_at  | MGP         | 2.037377 | 10.41612 | 1.32x10 <sup>-68</sup> |
| 238458_at    | MICU3       | 1.219403 | 4.103736 | 4.47x10 <sup>-51</sup> |
| 225381_at    | MIR100HG    | 2.364038 | 6.024706 | 2.09x10 <sup>-73</sup> |
| 1558828_s_at | MIR143HG    | 1.424978 | 5.320136 | 2.52x10 <sup>-41</sup> |
| 201069_at    | MMP2        | 1.180958 | 9.332255 | 6.56x10 <sup>-44</sup> |
| 205612_at    | MMRN1       | 1.216556 | 4.327802 | 1.94x10 <sup>-35</sup> |
| 236262_at    | MMRN2       | 1.039252 | 6.074128 | 3.2x10 <sup>-49</sup>  |
| 205330_at    | MN1         | 1.369413 | 5.878555 | 1.97x10 <sup>-43</sup> |
| 209708_at    | MOXD1       | 1.288922 | 6.328755 | 3.52x10 <sup>-51</sup> |
| 213306_at    | MPDZ        | 1.418881 | 7.283652 | 3.58x10 <sup>-69</sup> |
| 204438_at    | MRC1        | 1.059416 | 8.054805 | 2.97x10 <sup>-26</sup> |
| 227727_at    | MRGPRF      | 1.797924 | 6.945491 | 3.27x10 <sup>-63</sup> |
| 226047_at    | MRVI1       | 1.380027 | 8.429706 | 4.58x10 <sup>-56</sup> |
| 228592_at    | MS4A1       | 1.085664 | 6.112863 | 4.39x10 <sup>-11</sup> |
| 219607_s_at  | MS4A4A      | 1.047595 | 8.087338 | 5.88x10 <sup>-21</sup> |
| 230550_at    | MS4A6A      | 1.049156 | 6.022438 | 5.28x10 <sup>-34</sup> |
| 223343_at    | MS4A7       | 1.0712   | 8.342648 | 8.4x10 <sup>-35</sup>  |
| 225782_at    | MSRB3       | 1.942689 | 8.348081 | 3.74x10 <sup>-66</sup> |
| 212509_s_at  | MXRA7       | 1.048232 | 10.52417 | 1.53x10 <sup>-46</sup> |
| 212372_at    | MYH10       | 1.014775 | 8.806914 | 1.11x10 <sup>-27</sup> |
| 201496_x_at  | MYH11       | 2.465961 | 7.811111 | 2.54x10 <sup>-50</sup> |
| 201058_s_at  | MYL9        | 1.753051 | 8.369414 | 1.48x10 <sup>-50</sup> |
| 202555_s_at  | MYLK        | 1.851534 | 9.99092  | 2x10 <sup>-60</sup>    |
| 237206_at    | MYOCD       | 1.828855 | 6.215232 | 9.48x10 <sup>-49</sup> |
| 204749_at    | NAP1L3      | 1.736233 | 4.95288  | 1.21x10 <sup>-61</sup> |
| 228062_at    | NAP1L5      | 1.021278 | 6.0071   | 1.12x10 <sup>-31</sup> |
| 221207_s_at  | NBEA        | 1.340711 | 6.219292 | 1.09x10 <sup>-34</sup> |
| 209550_at    | NDN         | 1.40954  | 7.408421 | 2.37x10 <sup>-62</sup> |
| 229461_x_at  | NEGR1       | 1.868267 | 5.542278 | 1.86x10 <sup>-57</sup> |
| 226103_at    | NEXN        | 1.826831 | 7.606091 | 3.45x10 <sup>-56</sup> |
| 213438_at    | NFASC       | 1.364434 | 5.316127 | 2.9x10 <sup>-42</sup>  |
| 214321_at    | NOV         | 1.075137 | 5.313606 | 1.41x10 <sup>-30</sup> |
| 209505_at    | NR2F1       | 1.314367 | 7.277161 | 1.16x10 <sup>-43</sup> |
| 227971_at    | NRK         | 1.186159 | 4.048683 | 5.12x10 <sup>-29</sup> |
| 218625_at    | NRN1        | 1.008833 | 5.989221 | 1.47x10 <sup>-25</sup> |
| 222877_at    | NRP2        | 1.517839 | 6.394848 | 7.32x10 <sup>-50</sup> |
| 229649_at    | NRXN3       | 1.629083 | 6.130036 | 3.92x10 <sup>-32</sup> |
| 222722_at    | OGN         | 3.0176   | 6.394529 | 5.03x10 <sup>-57</sup> |
| 213131_at    | OLFM1       | 1.085559 | 6.512829 | 8.6x10 <sup>-32</sup>  |
| 217525_at    | OLFML1      | 1.076925 | 6.60937  | 6.36x10 <sup>-50</sup> |
| 218162_at    | OLFML3      | 1.100565 | 7.76027  | 2.85x10 <sup>-33</sup> |
| 205907_s_at  | OMD         | 1.645506 | 5.019403 | 6.4x10 <sup>-42</sup>  |
| 206637_at    | P2RY14      | 1.318037 | 7.133281 | 8.94x10 <sup>-36</sup> |
| 200907_s_at  | PALLD       | 1.148859 | 10.14429 | 1.89x10 <sup>-50</sup> |
| 218736_s_at  | PALMD       | 1.1242   | 6.135229 | 7.84x10 <sup>-43</sup> |
| 226435_at    | PAPLN       | 1.212856 | 6.403719 | 4.22x10 <sup>-41</sup> |
| 224941_at    | PAPPA       | 1.044356 | 5.599031 | 1.28x10 <sup>-35</sup> |
| 212148_at    | PBX1        | 1.093177 | 8.136259 | 6.95x10 <sup>-30</sup> |
| 228640_at    | PCDH7       | 1.467141 | 7.619239 | 1.12x10 <sup>-28</sup> |

Table SI. Continued.

| ID_Reference | Gene symbol | logFC    | AveExpr  | P-value                |
|--------------|-------------|----------|----------|------------------------|
| 238919_at    | PCDH9       | 1.043031 | 3.549646 | 1.66x10 <sup>-31</sup> |
| 208396_s_at  | PDE1A       | 1.554086 | 5.957696 | 6.68x10 <sup>-62</sup> |
| 228507_at    | PDE3A       | 1.400952 | 6.944268 | 2.32x10 <sup>-47</sup> |
| 227088_at    | PDE5A       | 1.150292 | 7.859092 | 4.28x10 <sup>-40</sup> |
| 230109_at    | PDE7B       | 1.159349 | 6.563766 | 4.42x10 <sup>-52</sup> |
| 203131_at    | PDGFRA      | 1.191436 | 9.842846 | 3.22x10 <sup>-42</sup> |
| 205226_at    | PDGFRL      | 1.268613 | 5.848473 | 8.28x10 <sup>-39</sup> |
| 225207_at    | PDK4        | 1.39525  | 8.31463  | 8.22x10 <sup>-30</sup> |
| 209621_s_at  | PDLIM3      | 1.739764 | 8.752246 | 4.27x10 <sup>-66</sup> |
| 212915_at    | PDZRN3      | 1.645411 | 7.807949 | 2.67x10 <sup>-53</sup> |
| 220595_at    | PDZRN4      | 1.638791 | 4.145424 | 1.78x10 <sup>-40</sup> |
| 209242_at    | PEG3        | 1.503481 | 5.181569 | 7.22x10 <sup>-45</sup> |
| 213791_at    | PENK        | 1.108564 | 4.322329 | 4.87x10 <sup>-22</sup> |
| 226303_at    | PGM5        | 2.067415 | 6.850579 | 1.76x10 <sup>-49</sup> |
| 230595_at    | PGM5-AS1    | 1.18804  | 5.48065  | 1.55x10 <sup>-31</sup> |
| 225688_s_at  | PHLDB2      | 1.308211 | 8.48119  | 5.9x10 <sup>-41</sup>  |
| 229947_at    | PI15        | 1.611703 | 6.298024 | 4.7x10 <sup>-29</sup>  |
| 219093_at    | PID1        | 1.178951 | 6.517807 | 7.1x10 <sup>-34</sup>  |
| 203688_at    | PKD2        | 1.120933 | 7.559153 | 4.56x10 <sup>-55</sup> |
| 202732_at    | PKIG        | 1.029429 | 8.872909 | 1.94x10 <sup>-58</sup> |
| 209785_s_at  | PLA2G4C     | 1.02227  | 6.445738 | 3.41x10 <sup>-41</sup> |
| 227419_x_at  | PLAC9       | 1.222196 | 6.458472 | 5.93x10 <sup>-47</sup> |
| 204939_s_at  | PLN         | 2.35615  | 7.358434 | 7.71x10 <sup>-60</sup> |
| 210198_s_at  | PLP1        | 1.080517 | 3.947412 | 8.73x10 <sup>-28</sup> |
| 218901_at    | PLSCR4      | 1.23095  | 7.554217 | 1.61x10 <sup>-47</sup> |
| 238455_at    | PLXDC2      | 1.3672   | 6.043362 | 1.47x10 <sup>-46</sup> |
| 210139_s_at  | PMP22       | 1.123199 | 9.951013 | 8.2x10 <sup>-57</sup>  |
| 226522_at    | PODN        | 1.070445 | 6.800234 | 6.51x10 <sup>-48</sup> |
| 201957_at    | PPP1R12B    | 1.315514 | 8.137276 | 1.55x10 <sup>-37</sup> |
| 227006_at    | PPP1R14A    | 1.317621 | 6.630356 | 2.68x10 <sup>-37</sup> |
| 204284_at    | PPP1R3C     | 1.383354 | 7.00059  | 4.93x10 <sup>-30</sup> |
| 228224_at    | PRELP       | 1.271083 | 6.603349 | 1.58x10 <sup>-49</sup> |
| 228692_at    | PREX2       | 1.057507 | 4.017038 | 5.34x10 <sup>-59</sup> |
| 226069_at    | PRICKLE1    | 1.026071 | 5.421055 | 1.92x10 <sup>-34</sup> |
| 225968_at    | PRICKLE2    | 1.293616 | 6.157322 | 1.92x10 <sup>-54</sup> |
| 230087_at    | PRIMA1      | 1.261103 | 5.824778 | 2.81x10 <sup>-35</sup> |
| 203680_at    | PRKAR2B     | 1.573657 | 7.389838 | 3.07x10 <sup>-54</sup> |
| 207957_s_at  | PRKCB       | 1.284633 | 5.881915 | 1.11x10 <sup>-34</sup> |
| 205880_at    | PRKD1       | 1.265461 | 5.774156 | 3.88x10 <sup>-56</sup> |
| 228396_at    | PRKG1       | 1.115425 | 7.652447 | 1.82x10 <sup>-55</sup> |
| 226695_at    | PRRX1       | 1.423611 | 7.845836 | 2.06x10 <sup>-41</sup> |
| 226279_at    | PRSS23      | 1.062036 | 8.92581  | 1.89x10 <sup>-40</sup> |
| 212805_at    | PRUNE2      | 2.022945 | 6.95933  | 9.9x10 <sup>-52</sup>  |
| 212187_x_at  | PTGDS       | 1.012409 | 8.701941 | 5.83x10 <sup>-24</sup> |
| 213933_at    | PTGER3      | 1.404981 | 5.956556 | 1.62x10 <sup>-47</sup> |
| 207177_at    | PTGFR       | 1.159589 | 4.700414 | 7.5x10 <sup>-55</sup>  |
| 208131_s_at  | PTGIS       | 1.649286 | 7.594499 | 2.83x10 <sup>-45</sup> |
| 211737_x_at  | PTN         | 1.282799 | 7.349817 | 1.29x10 <sup>-41</sup> |
| 219654_at    | PTPLA       | 1.099698 | 6.494076 | 3.45x10 <sup>-20</sup> |
| 208790_s_at  | PTRF        | 1.038824 | 6.362992 | 4.25x10 <sup>-37</sup> |
| 206157_at    | PTX3        | 1.223153 | 4.487572 | 2.22x10 <sup>-27</sup> |
| 212636_at    | QKI         | 1.034217 | 8.18395  | 1.19x10 <sup>-44</sup> |
| 229504_at    | RAB23       | 1.409272 | 7.099885 | 1.91x10 <sup>-46</sup> |
| 217764_s_at  | RAB31       | 1.015781 | 9.753266 | 6.36x10 <sup>-43</sup> |
| 219440_at    | RAI2        | 1.301964 | 6.480311 | 6.04x10 <sup>-43</sup> |
| 225946_at    | RASSF8      | 1.542121 | 6.633534 | 8.19x10 <sup>-64</sup> |
| 235004_at    | RBM24       | 1.120952 | 4.476584 | 1.15x10 <sup>-34</sup> |
| 238447_at    | RBMS3       | 1.606938 | 6.96435  | 1.74x10 <sup>-60</sup> |
| 228802_at    | BPMS2       | 1.36486  | 6.68093  | 8.67x10 <sup>-40</sup> |

Table SI. Continued.

| ID_Reference | Gene symbol  | logFC    | AveExpr  | P-value                |
|--------------|--------------|----------|----------|------------------------|
| 203498_at    | RCAN2        | 1.448774 | 7.926367 | 3.95x10 <sup>-51</sup> |
| 205407_at    | RECK         | 1.475009 | 6.716006 | 7.36x10 <sup>-68</sup> |
| 204364_s_at  | REEP1        | 1.258406 | 6.322235 | 2.33x10 <sup>-22</sup> |
| 227758_at    | RERG         | 1.855956 | 7.034451 | 1.43x10 <sup>-64</sup> |
| 223468_s_at  | RGMA         | 1.451628 | 7.096428 | 1.09x10 <sup>-49</sup> |
| 202388_at    | RGS2         | 1.005027 | 10.50801 | 5.63x10 <sup>-39</sup> |
| 204337_at    | RGS4         | 1.378662 | 6.749813 | 1.11x10 <sup>-39</sup> |
| 218353_at    | RGS5         | 1.078972 | 9.544647 | 1.2x10 <sup>-32</sup>  |
| 235489_at    | RHOJ         | 1.505458 | 5.62466  | 6.3x10 <sup>-61</sup>  |
| 229024_at    | RNF150       | 1.323849 | 5.017906 | 6.48x10 <sup>-49</sup> |
| 242033_at    | RNF180       | 1.01931  | 3.787872 | 4.1x10 <sup>-46</sup>  |
| 226885_at    | RNF217       | 1.150457 | 5.611139 | 3.86x10 <sup>-42</sup> |
| 226682_at    | RORA         | 1.095935 | 7.395787 | 1.42x10 <sup>-49</sup> |
| 238623_at    | RP3-428L16.2 | 1.231261 | 6.055378 | 9.52x10 <sup>-31</sup> |
| 228186_s_at  | RSPO3        | 2.176893 | 7.164153 | 1.81x10 <sup>-65</sup> |
| 203485_at    | RTN1         | 1.106311 | 5.585496 | 3.95x10 <sup>-30</sup> |
| 228827_at    | RUNX1T1      | 1.755992 | 5.982748 | 1.02x10 <sup>-61</sup> |
| 228176_at    | S1PR3        | 1.278106 | 7.703264 | 6.93x10 <sup>-47</sup> |
| 212845_at    | SAMD4A       | 1.168701 | 7.578184 | 6.17x10 <sup>-49</sup> |
| 229839_at    | SCARA5       | 1.149794 | 4.999748 | 1.56x10 <sup>-24</sup> |
| 204035_at    | SCG2         | 1.089403 | 4.941184 | 2.07x10 <sup>-21</sup> |
| 228504_at    | SCN7A        | 1.821312 | 4.150286 | 2.12x10 <sup>-43</sup> |
| 205475_at    | SCRG1        | 2.462601 | 5.974159 | 1.11x10 <sup>-52</sup> |
| 212158_at    | SDC2         | 1.034066 | 8.700239 | 4.75x10 <sup>-42</sup> |
| 222717_at    | SDPR         | 1.717141 | 6.718385 | 2.05x10 <sup>-59</sup> |
| 206211_at    | SELE         | 1.009138 | 5.206068 | 2.08x10 <sup>-17</sup> |
| 226051_at    | SELM         | 1.031424 | 9.197341 | 8.33x10 <sup>-45</sup> |
| 206049_at    | SELP         | 1.031484 | 6.459784 | 1.22x10 <sup>-43</sup> |
| 226492_at    | SEMA6D       | 1.041258 | 5.769749 | 5.39x10 <sup>-26</sup> |
| 212190_at    | SERPINE2     | 1.073087 | 9.074813 | 3.17x10 <sup>-28</sup> |
| 202283_at    | SERPINF1     | 1.38559  | 9.210089 | 7.16x10 <sup>-52</sup> |
| 200986_at    | SERPING1     | 1.092277 | 8.817173 | 9.33x10 <sup>-40</sup> |
| 227478_at    | SETBP1       | 1.63669  | 6.272939 | 3.63x10 <sup>-56</sup> |
| 202037_s_at  | SFRP1        | 2.089225 | 6.140828 | 5.33x10 <sup>-53</sup> |
| 223122_s_at  | SFRP2        | 2.400193 | 8.355822 | 4.07x10 <sup>-39</sup> |
| 204051_s_at  | SFRP4        | 1.827903 | 7.394867 | 1.4x10 <sup>-29</sup>  |
| 230730_at    | SGCD         | 1.247017 | 5.520738 | 1.75x10 <sup>-44</sup> |
| 204688_at    | SGCE         | 1.242978 | 7.852796 | 2.54x10 <sup>-38</sup> |
| 230003_at    | SLC16A7      | 1.172279 | 5.564978 | 5.78x10 <sup>-36</sup> |
| 219090_at    | SLC24A3      | 1.255246 | 6.874729 | 4.32x10 <sup>-52</sup> |
| 235518_at    | SLC8A1       | 1.062668 | 6.619629 | 3.06x10 <sup>-45</sup> |
| 230130_at    | SLIT2        | 1.745588 | 5.619162 | 4.02x10 <sup>-52</sup> |
| 227719_at    | SMAD9        | 1.564135 | 7.140645 | 1.22x10 <sup>-41</sup> |
| 223235_s_at  | SMOC2        | 1.803311 | 8.535752 | 1.1x10 <sup>-39</sup>  |
| 219772_s_at  | SMPX         | 1.316492 | 4.584635 | 9.11x10 <sup>-21</sup> |
| 207390_s_at  | SMTN         | 1.122519 | 6.679288 | 1.08x10 <sup>-30</sup> |
| 202508_s_at  | SNAP25       | 1.009885 | 4.556204 | 1.85x10 <sup>-17</sup> |
| 218974_at    | SOBP         | 1.1092   | 6.992992 | 7.44x10 <sup>-30</sup> |
| 218087_s_at  | SORBS1       | 1.875976 | 7.98431  | 2.19x10 <sup>-43</sup> |
| 225728_at    | SORBS2       | 1.162838 | 7.664929 | 9.79x10 <sup>-21</sup> |
| 212667_at    | SPARC        | 1.053058 | 9.984479 | 8.48x10 <sup>-43</sup> |
| 200795_at    | SPARCL1      | 1.559812 | 11.10806 | 3.95x10 <sup>-73</sup> |
| 236600_at    | SPG20        | 1.23125  | 5.071674 | 2.58x10 <sup>-56</sup> |
| 202363_at    | SPOCK1       | 1.647433 | 6.755955 | 3.35x10 <sup>-40</sup> |
| 213994_s_at  | SPON1        | 1.999477 | 7.246496 | 8.81x10 <sup>-63</sup> |
| 204955_at    | SRPX         | 1.744107 | 7.153331 | 4.43x10 <sup>-51</sup> |
| 203787_at    | SSBP2        | 1.055663 | 6.883985 | 3.39x10 <sup>-34</sup> |
| 226932_at    | SSPN         | 1.367721 | 7.744141 | 8.5x10 <sup>-49</sup>  |
| 220979_s_at  | ST6GALNAC5   | 1.444739 | 5.449629 | 3.05x10 <sup>-45</sup> |



Table SI. Continued.

| ID_Reference | Gene symbol | logFC    | AveExpr  | P-value                |
|--------------|-------------|----------|----------|------------------------|
| 225987_at    | STEAP4      | 1.325389 | 7.064118 | 3.76x10 <sup>-34</sup> |
| 203000_at    | STMN2       | 1.088424 | 4.982417 | 5.52x10 <sup>-28</sup> |
| 213413_at    | STON1       | 1.778029 | 6.7353   | 1.13x10 <sup>-66</sup> |
| 212353_at    | SULF1       | 1.127784 | 9.09824  | 1.35x10 <sup>-22</sup> |
| 213247_at    | SVEP1       | 1.165721 | 6.80762  | 1.07x10 <sup>-53</sup> |
| 202565_s_at  | SVIL        | 1.018739 | 8.739737 | 2.2x10 <sup>-34</sup>  |
| 221276_s_at  | SYNC        | 1.779468 | 6.049188 | 1.2x10 <sup>-52</sup>  |
| 209447_at    | SYNE1       | 1.247437 | 6.867273 | 2.6x10 <sup>-59</sup>  |
| 212730_at    | SYNM        | 2.205284 | 8.021499 | 8.02x10 <sup>-47</sup> |
| 227662_at    | SYNPO2      | 2.623602 | 7.565749 | 6.77x10 <sup>-55</sup> |
| 206552_s_at  | TAC1        | 1.160457 | 3.813843 | 1.26x10 <sup>-18</sup> |
| 205547_s_at  | TAGLN       | 1.773829 | 10.30236 | 1.44x10 <sup>-58</sup> |
| 211276_at    | TCEAL2      | 1.560806 | 4.317158 | 1.13x10 <sup>-36</sup> |
| 227705_at    | TCEAL7      | 1.791869 | 5.546043 | 5.1x10 <sup>-72</sup>  |
| 204931_at    | TCF21       | 1.355566 | 6.223807 | 3.34x10 <sup>-59</sup> |
| 212382_at    | TCF4        | 1.046955 | 7.622359 | 5.96x10 <sup>-52</sup> |
| 206702_at    | TEK         | 1.024783 | 6.143633 | 1.13x10 <sup>-56</sup> |
| 209278_s_at  | TFPI2       | 1.527314 | 5.724805 | 2.65x10 <sup>-29</sup> |
| 209651_at    | TGFB11I     | 1.257077 | 8.889315 | 3.5x10 <sup>-49</sup>  |
| 201109_s_at  | THBS1       | 1.324174 | 8.390431 | 7.95x10 <sup>-50</sup> |
| 203083_at    | THBS2       | 1.279223 | 8.539963 | 2.33x10 <sup>-25</sup> |
| 204776_at    | THBS4       | 1.946409 | 7.520105 | 2.03x10 <sup>-47</sup> |
| 214920_at    | THSD7A      | 1.139829 | 5.235295 | 1.03x10 <sup>-44</sup> |
| 224560_at    | TIMP2       | 1.139305 | 10.00109 | 6x10 <sup>-48</sup>    |
| 201150_s_at  | TIMP3       | 1.194835 | 9.318974 | 6.82x10 <sup>-38</sup> |
| 219230_at    | TMEM100     | 1.750927 | 6.048048 | 1.63x10 <sup>-40</sup> |
| 219685_at    | TMEM35      | 1.235306 | 4.508201 | 3.45x10 <sup>-34</sup> |
| 209656_s_at  | TMEM47      | 1.441343 | 9.21589  | 1.51x10 <sup>-60</sup> |
| 226322_at    | TMTC1       | 1.425066 | 6.769485 | 2.79x10 <sup>-60</sup> |
| 201645_at    | TNC         | 1.879482 | 9.122363 | 3.49x10 <sup>-57</sup> |
| 221748_s_at  | TNS1        | 1.601448 | 8.893675 | 7.7x10 <sup>-55</sup>  |
| 204529_s_at  | TOX         | 1.028894 | 6.902239 | 1.6x10 <sup>-22</sup>  |
| 206116_s_at  | TPM1        | 1.041925 | 10.32226 | 1.89x10 <sup>-36</sup> |
| 204083_s_at  | TPM2        | 1.486048 | 10.04898 | 5.29x10 <sup>-43</sup> |
| 205803_s_at  | TRPC1       | 1.266505 | 5.14113  | 1.41x10 <sup>-49</sup> |
| 238577_s_at  | TSHZ2       | 1.057343 | 5.766427 | 4.29x10 <sup>-42</sup> |
| 223393_s_at  | TSHZ3       | 1.20535  | 6.026523 | 4.58x10 <sup>-68</sup> |
| 227236_at    | TSPAN2      | 1.490592 | 7.048138 | 2.08x10 <sup>-47</sup> |
| 202242_at    | TSPAN7      | 1.093686 | 6.676642 | 6.06x10 <sup>-27</sup> |
| 213122_at    | TSPYL5      | 1.104092 | 7.087461 | 3.05x10 <sup>-21</sup> |
| 215146_s_at  | TTC28       | 1.086531 | 6.185017 | 3.62x10 <sup>-50</sup> |
| 209191_at    | TUBB6       | 1.088291 | 9.433804 | 3.5x10 <sup>-46</sup>  |
| 213943_at    | TWIST1      | 1.052645 | 5.652659 | 1.48x10 <sup>-23</sup> |
| 229404_at    | TWIST2      | 1.17077  | 5.234325 | 2.3x10 <sup>-54</sup>  |
| 205694_at    | TYRP1       | 1.523835 | 6.084344 | 7.05x10 <sup>-30</sup> |
| 215646_s_at  | VCAN        | 1.158174 | 8.273958 | 2.85x10 <sup>-33</sup> |
| 227399_at    | VGLL3       | 1.252896 | 6.121999 | 8.13x10 <sup>-34</sup> |
| 206577_at    | VIP         | 1.315925 | 3.718029 | 1.77x10 <sup>-28</sup> |
| 209822_s_at  | VLDLR       | 1.09257  | 5.491804 | 1.73x10 <sup>-25</sup> |
| 204042_at    | WASF3       | 1.064797 | 6.485053 | 3.55x10 <sup>-23</sup> |
| 229802_at    | WISP1       | 1.270317 | 6.58318  | 2.42x10 <sup>-32</sup> |
| 228949_at    | WLS         | 1.08022  | 8.401526 | 9.97x10 <sup>-40</sup> |
| 238512_at    | WNT2B       | 1.287707 | 6.029841 | 2.64x10 <sup>-38</sup> |
| 202133_at    | WWTR1       | 1.032114 | 9.962536 | 3.68x10 <sup>-38</sup> |
| 223519_at    | ZAK         | 1.071617 | 7.698687 | 4.62x10 <sup>-30</sup> |
| 213156_at    | ZBTB20      | 1.014852 | 7.95731  | 5.2x10 <sup>-39</sup>  |
| 212423_at    | ZCCHC24     | 1.418507 | 7.961771 | 2.24x10 <sup>-63</sup> |
| 228333_at    | ZEB2        | 1.32891  | 6.636521 | 1.66x10 <sup>-62</sup> |
| 219778_at    | ZFPM2       | 1.73229  | 5.273902 | 1.24x10 <sup>-61</sup> |

Table SI. Continued.

| ID_Reference | Gene symbol | logFC    | AveExpr  | P-value                |
|--------------|-------------|----------|----------|------------------------|
| 214761_at    | ZNF423      | 1.267995 | 6.257603 | 2.28x10 <sup>-53</sup> |
| 226677_at    | ZNF521      | 1.404098 | 5.647238 | 1.54x10 <sup>-54</sup> |
| 244741_s_at  | ZNF667-AS1  | 1.190614 | 5.545221 | 8.42x10 <sup>-50</sup> |
| 228974_at    | ZNF677      | 1.067789 | 5.093853 | 3.41x10 <sup>-45</sup> |
| 218312_s_at  | ZSCAN18     | 1.065479 | 7.03731  | 1.74x10 <sup>-29</sup> |

FGF2, fibroblast growth factor 2; FC, fold change; AveExpr, average expression.
